# Supplementary material
Source: PubMed Central journal article supplement (PMC3833977)
Supplement: NIHMS500882-supplement-Supp_Table_S1-S3.pdf [file NIHMS500882-supplement-Supp_Table_S1-S3.pdf]

## Genetic variation at the delta-sarcoglycan (*SGCD*) locus elevates heritable sympathetic nerve activity in human twin pairs.

Hightower *et al.*, 05/28/13

### ONLINE TABLES AND TABLE LEGENDS SUPPLEMENT.

**Table S1.** Heritability ( $h^2$ ), shared genetic determination (genetic co-determination,  $RhoG$  also known as pleiotropy,  $\rho_G$ ) and environmental determination (environmental co-determination,  $RhoE$ ,  $\rho_E$ ) for traits correlated with plasma norepinephrine (pNE), by variance component analyses in twin pairs.  $RhoG$  and  $RhoE$  are fractions (covariances), scaled from -1 to +1, and determined in SOLAR. Pearson parametric trait-on-trait correlations are also reported. BMI indicates body mass index; SBP, systolic blood pressure; DBP, diastolic blood pressure; HR, heart rate; LV, left ventricular; SVR, systemic vascular resistance; CHGB, chromogranin B; eGFR, estimated glomerular filtration rate; eGFR (CKD-EPI), estimated glomerular filtration rate by Chronic Kidney Disease Epidemiology Collaboration algorithm. Significant differences ( $P < 0.05$ ) are **bold**. Analyses were completed in monozygotic and dizygotic twin pairs.

**Table S2.** Norepinephrine secretion quantiles, with quantile-associated traits: Descriptive and inferential statistics for twin and sibling study populations, divided about the median value for plasma norepinephrine. Inferential statistics for twins were derived from GEE to account for correlations within pairs. Numbers (N) describe the number of individuals analyzed. CHGB indicates Chromogranin B; HDL, High Density Lipoprotein; LDL, Low Density Lipoprotein; Lp(a), Lipoprotein (a); eGFR (CKD-EPI), estimated glomerular filtration rate by Chronic Kidney Disease-Epidemiology Collaboration algorithm. Significant differences ( $P < 0.05$ ) are **bold**.

**Table S3.** *SGCD* genetic variation: Prediction of multiple trait values by the peak norepinephrine secretion-associated *SGCD* SNP (rs1835919) in twins and siblings. An analysis of subject's genotype that compares pleiotropic effects across physical, physiological, and biochemical traits. Subjects are analyzed by an additive model for single nucleotide polymorphism (SNP) resulting disease phenotypes. Numbers (N) describe the number of individuals analyzed. Significant differences ( $P < 0.05$ ) are in **bold**. FDR indicates false discovery rate; CHGB, Chomogranin B; FFA, free fatty acid.

| Table S1. Plasma norepinephrine (pNE): Heritable shared genetic and environmental effects in physical, hemodynamic/autonomic, and biochemical traits. |                |       |                 |                                |                 |     |                                  |       |                 |                                        |       |                 |
|-------------------------------------------------------------------------------------------------------------------------------------------------------|----------------|-------|-----------------|--------------------------------|-----------------|-----|----------------------------------|-------|-----------------|----------------------------------------|-------|-----------------|
| Traits                                                                                                                                                | Heritability   |       |                 | Correlation (Pearson) with pNE |                 | N   | Genetic codetermination with pNE |       |                 | Environmental codetermination with pNE |       |                 |
|                                                                                                                                                       | h <sup>2</sup> | SEM   | p               | Correlation Coefficient        | Sig. (2-tailed) |     | RhoG                             | SEM   | p               | RhoE                                   | SEM   | p               |
| <b>Physical</b>                                                                                                                                       |                |       |                 |                                |                 |     |                                  |       |                 |                                        |       |                 |
| BMI                                                                                                                                                   | 0.813          | 0.028 | <b>3.67E-33</b> | 0.03                           | 0.501           | 521 | -0.078                           | 0.087 | <b>3.70E-01</b> | -0.082                                 | 0.092 | 0.378           |
| <b>Hemodynamic/Autonomic</b>                                                                                                                          |                |       |                 |                                |                 |     |                                  |       |                 |                                        |       |                 |
| SBP, mmHg                                                                                                                                             | 0.446          | 0.067 | <b>1.60E-08</b> | 0.124                          | <b>6.00E-03</b> | 493 | 0.004                            | 0.119 | 0.971           | 0.064                                  | 0.091 | 0.483           |
| DBP, mmHg                                                                                                                                             | 0.440          | 0.071 | <b>1.00E-07</b> | 0.119                          | <b>8.00E-03</b> | 495 | -0.080                           | 0.124 | 0.515           | 0.200                                  | 0.095 | <b>4.20E-02</b> |
| HR,beats/min                                                                                                                                          | 0.622          | 0.053 | <b>1.84E-15</b> | -0.050                         | 0.257           | 507 | -0.066                           | 0.104 | 0.527           | 0.074                                  | 0.097 | 0.454           |
| LV contractility, mmHg/s                                                                                                                              | 0.399          | 0.072 | <b>9.00E-07</b> | -0.044                         | 0.330           | 491 | 0.071                            | 0.125 | 0.572           | -0.064                                 | 0.096 | 0.507           |
| Cardiac output, l/min                                                                                                                                 | 0.668          | 0.048 | <b>7.38E-18</b> | -0.015                         | 0.743           | 485 | -0.148                           | 0.099 | 0.138           | 0.022                                  | 0.103 | 0.829           |
| Cardiac index, l/min/m <sup>2</sup>                                                                                                                   | 0.604          | 0.056 | <b>2.13E-14</b> | -0.029                         | 0.529           | 488 | -0.075                           | 0.106 | 0.479           | 0.072                                  | 0.103 | 0.485           |
| Stroke volume, ml/m <sup>2</sup>                                                                                                                      | 0.731          | 0.041 | <b>2.19E-21</b> | -0.007                         | 0.881           | 487 | -0.069                           | 0.095 | 0.473           | -0.167                                 | 0.100 | 0.103           |
| Stroke volume index, ml                                                                                                                               | 0.582          | 0.058 | <b>6.38E-13</b> | -0.018                         | 0.690           | 487 | -0.019                           | 0.108 | 0.861           | -0.092                                 | 0.100 | 0.362           |
| Systemic vascular compliance, ml/mmHg                                                                                                                 | 0.533          | 0.063 | <b>6.40E-11</b> | -0.118                         | <b>9.00E-03</b> | 491 | -0.222                           | 0.108 | <b>4.42E-02</b> | -0.068                                 | 0.097 | 0.482           |
| SVR, dynes/s/cm <sup>5</sup>                                                                                                                          | 0.573          | 0.056 | <b>1.18E-13</b> | 0.095                          | <b>3.60E-02</b> | 491 | 0.200                            | 0.106 | <b>6.20E-02</b> | 0.005                                  | 0.100 | 0.963           |
| Baroreceptor slope upward deflection, msec/mmHg                                                                                                       | 0.254          | 0.083 | <b>1.91E-03</b> | -0.153                         | <b>4.74E-04</b> | 517 | 0.100                            | 0.161 | 0.529           | -0.151                                 | 0.092 | 0.106           |
| Baroreceptor slope downward deflection, msec/mmHg                                                                                                     | 0.370          | 0.075 | <b>6.30E-06</b> | -0.118                         | <b>8.00E-03</b> | 507 | 0.078                            | 0.128 | 0.540           | -0.105                                 | 0.097 | 0.284           |
| <b>Biochemical:</b>                                                                                                                                   |                |       |                 |                                |                 |     |                                  |       |                 |                                        |       |                 |
| <b>Catecholamines</b>                                                                                                                                 |                |       |                 |                                |                 |     |                                  |       |                 |                                        |       |                 |
| Plasma norepinephrine, pg/ml                                                                                                                          | 0.652          | 0.050 | <b>3.19E-16</b> | -                              | -               | -   | -                                | -     | -               | -                                      | -     | -               |
| Plasma epinephrine, pg/ml                                                                                                                             | 0.665          | 0.051 | <b>5.09E-16</b> | 0.226                          | <b>1.82E-07</b> | 523 | 0.355                            | 0.086 | <b>2.56E-04</b> | 0.273                                  | 0.087 | <b>3.00E-03</b> |
| Urine norepinephrine, ng/g                                                                                                                            | 0.490          | 0.074 | <b>1.00E-07</b> | 0.413                          | <b>6.42E-19</b> | 425 | 0.062                            | 0.097 | 0.527           | 0.219                                  | 0.092 | <b>2.10E-02</b> |
| Urine epinephrine, ng/g                                                                                                                               | 0.781          | 0.035 | <b>2.16E-24</b> | 0.062                          | 0.208           | 419 | 0.430                            | 0.102 | <b>3.38E-04</b> | 0.294                                  | 0.089 | <b>2.00E-03</b> |
| CHGB [312-331], nmol/l                                                                                                                                | 0.565          | 0.056 | <b>1.11E-13</b> | 0.120                          | <b>8.00E-03</b> | 494 | 0.298                            | 0.100 | <b>4.58E-03</b> | 0.057                                  | 0.087 | 0.517           |
| CHGB [439-451], nmol/l                                                                                                                                | 0.476          | 0.067 | <b>3.98E-09</b> | 0.004                          | 0.936           | 498 | 0.124                            | 0.123 | 0.319           | 0.088                                  | 0.092 | 0.345           |
| <b>Renin-angiotensin system</b>                                                                                                                       |                |       |                 |                                |                 |     |                                  |       |                 |                                        |       |                 |
| Plasma active renin pg/ml                                                                                                                             | 0.524          | 0.062 | <b>2.70E-11</b> | -0.128                         | <b>1.5E-02</b>  | 360 | -0.243                           | 0.112 | <b>3.19E-02</b> | 0.096                                  | 0.090 | 0.289           |
| <b>Metabolic</b>                                                                                                                                      |                |       |                 |                                |                 |     |                                  |       |                 |                                        |       |                 |
| Uric acid plasma, mg/dl                                                                                                                               | 0.647          | 0.055 | <b>1.28E-14</b> | 0.025                          | 0.586           | 488 | 0.100                            | 0.104 | 0.341           | -0.146                                 | 0.092 | 0.120           |
| Plasma free fatty acids, mmol/l                                                                                                                       | 0.275          | 0.084 | <b>1.02E-03</b> | 0.117                          | <b>1.40E-02</b> | 438 | -0.065                           | 0.161 | 0.684           | 0.168                                  | 0.090 | <b>6.70E-02</b> |
| Ratio urine to plasma uric acid                                                                                                                       | 0.376          | 0.075 | <b>6.40E-06</b> | 0.007                          | 0.877           | 486 | -0.038                           | 0.131 | 0.773           | 0.017                                  | 0.091 | 0.850           |
| Plasma neuropeptide Y, pmol/L                                                                                                                         | 0.727          | 0.037 | <b>1.29E-25</b> | 0.177                          | <b>6.01E-05</b> | 369 | 0.151                            | 0.088 | 0.093           | 0.167                                  | 0.088 | 0.065           |
| <b>Renal traits</b>                                                                                                                                   |                |       |                 |                                |                 |     |                                  |       |                 |                                        |       |                 |
| eGFR (CKD EPI), ml/min/1.73m <sup>2</sup>                                                                                                             | 0.673          | 0.047 | <b>3.80E-18</b> | -0.272                         | <b>8.97E-10</b> | 492 | -0.507                           | 0.090 | <b>1.99E-07</b> | 0.283                                  | 0.083 | <b>1.42E-03</b> |

| Table S2. Plasma norepinephrine quantiles: Effects on demographic, physical, and physiological traits |                  |                 |        |                  |                  |        |                         |
|-------------------------------------------------------------------------------------------------------|------------------|-----------------|--------|------------------|------------------|--------|-------------------------|
| Traits                                                                                                | pNE <305.8 pg/ml |                 |        | pNE ≥305.8 pg/ml |                  |        | Significance (2-tailed) |
|                                                                                                       | N                | Mean            | SEM    | N                | Mean             | SEM    |                         |
| <b>Demographic</b>                                                                                    |                  |                 |        |                  |                  |        |                         |
| Age, years                                                                                            | 266              | 36.11           | 0.892  | 265              | 42.42            | 1.025  | <b>4.29E-06</b>         |
| Sex, M/F                                                                                              | 266              | 65/201          |        | 265              | 87/178           |        | <b>3.20E-02</b>         |
| Blood pressure status, NT/HTN (%)                                                                     | 266              | 250(94%)/16(6%) |        | 265              | 228(86%)/37(14%) |        | <b>2.00E-03</b>         |
| <b>Physical</b>                                                                                       |                  |                 |        |                  |                  |        |                         |
| Body mass index, kg/m <sup>2</sup>                                                                    | 261              | 25.33           | 0.291  | 260              | 25.32            | 0.301  | 0.970                   |
| <b>Physiological</b>                                                                                  |                  |                 |        |                  |                  |        |                         |
| <b>Hemodynamic</b>                                                                                    |                  |                 |        |                  |                  |        |                         |
| Systolic blood pressure, mmHg                                                                         | 250              | 121.9           | 0.759  | 248              | 124.9            | 0.825  | <b>6.00E-03</b>         |
| Diastolic blood pressure, mmHg                                                                        | 252              | 75.2            | 0.532  | 247              | 77.0             | 0.615  | <b>2.60E-02</b>         |
| Mean arterial pressure, mmHg                                                                          | 254              | 89.4            | 0.632  | 249              | 91.2             | 0.663  | <b>4.90E-02</b>         |
| Pulse pressure, mmHg                                                                                  | 253              | 57.8            | 0.656  | 247              | 59.6             | 0.632  | <b>4.30E-02</b>         |
| Heart rate, beats/min                                                                                 | 255              | 70.1            | 0.670  | 252              | 68.3             | 0.660  | <b>5.50E-02</b>         |
| Left ventricular contractility, mmHg/s                                                                | 249              | 1181.4          | 11.183 | 241              | 1208.3           | 12.387 | 0.107                   |
| Cardiac output, l/min                                                                                 | 245              | 4.9             | 0.069  | 240              | 4.8              | 0.069  | 0.577                   |
| Cardiac index, l/min/m <sup>2</sup>                                                                   | 247              | 2.8             | 0.031  | 241              | 2.7              | 0.032  | 0.235                   |
| Stroke volume, ml                                                                                     | 247              | 70.0            | 0.823  | 240              | 70.3             | 0.799  | 0.841                   |
| Stroke volume index, ml/m <sup>2</sup>                                                                | 248              | 39.5            | 0.276  | 239              | 39.4             | 0.283  | 0.863                   |
| Systemic vascular compliance, ml/mmHg                                                                 | 248              | 1.3             | 0.014  | 243              | 1.2              | 0.015  | <b>6.20E-02</b>         |
| Systemic vascular resistance, dynes/s/cm <sup>5</sup>                                                 | 249              | 1490.8          | 19.986 | 242              | 1544.9           | 19.956 | <b>5.60E-02</b>         |
| Brachial artery compliance, ml/mmHg                                                                   | 247              | 0.1             | 0.001  | 240              | 0.1              | 0.002  | 0.956                   |
| <b>Autonomic</b>                                                                                      |                  |                 |        |                  |                  |        |                         |
| Baroreceptor slope upward deflection, msec/mmHg                                                       | 259              | 12.8            | 0.533  | 258              | 10.7             | 0.502  | <b>6.00E-03</b>         |
| Baroreceptor slope downward deflection, msec/mmHg                                                     | 255              | 10.2            | 0.428  | 252              | 8.9              | 0.382  | <b>2.40E-02</b>         |
| <b>Biochemical: Catecholamines</b>                                                                    |                  |                 |        |                  |                  |        |                         |
| Plasma norepinephrine, pg/ml                                                                          | 266              | 214.1           | 3.448  | 265              | 442.3            | 7.193  | <b>1.18E-109</b>        |
| Plasma epinephrine, pg/ml                                                                             | 264              | 23.7            | 0.938  | 259              | 30.5             | 1.217  | <b>1.08E-05</b>         |
| Plasma dopamine, pg/ml                                                                                | 260              | 17.8            | 1.739  | 262              | 21.7             | 1.200  | <b>6.50E-02</b>         |
| Urine norepinephrine, ng/g                                                                            | 218              | 241.0           | 6.468  | 207              | 320.1            | 8.601  | <b>7.94E-13</b>         |
| Urine epinephrine, ng/g                                                                               | 216              | 122.5           | 3.863  | 203              | 122.2            | 3.664  | 0.956                   |
| Urine dopamine, ng/g                                                                                  | 219              | 1663.2          | 45.853 | 209              | 1589.9           | 35.807 | 0.211                   |
| CHGB [312-331], nmol/l                                                                                | 256              | 0.8             | 0.018  | 238              | 0.8              | 0.022  | <b>7.70E-02</b>         |
| CHGB [439-451], nmol/l                                                                                | 258              | 0.3             | 0.008  | 240              | 0.3              | 0.009  | 0.862                   |
| <b>Biochemical: renin-angiotensin system (RAS)</b>                                                    |                  |                 |        |                  |                  |        |                         |
| Plasma active renin, pg/ml                                                                            | 194              | 16.5            | 0.814  | 166              | 14.0             | 0.714  | <b>2.50E-02</b>         |
| Plasma aldosterone, pg/ml                                                                             | 238              | 124.3           | 4.331  | 219              | 133.23           | 4.568  | 0.156                   |

|                                           |     |        |       |     |        |       |                 |
|-------------------------------------------|-----|--------|-------|-----|--------|-------|-----------------|
| Urine aldosterone, pg/g                   | 130 | 3.2    | 0.192 | 160 | 3.00   | 0.143 | 0.462           |
| <b>Biochemical: Metabolic</b>             |     |        |       |     |        |       |                 |
| Glucose plasma, mg/dl                     | 256 | 80.48  | 0.612 | 236 | 81.18  | 0.730 | 0.459           |
| Plasma QUICKI index                       | 221 | 0.34   | 0.002 | 204 | 0.341  | 0.002 | 0.195           |
| Plasma insulin, uUnit/ml                  | 243 | 11.29  | 0.429 | 239 | 10.30  | 0.363 | <b>8.40E-02</b> |
| Uric acid plasma, mg/dl                   | 254 | 4.13   | 0.061 | 234 | 4.18   | 0.073 | 0.565           |
| Ratio urine to plasma uric acid           | 248 | 6.61   | 0.287 | 217 | 7.79   | 0.540 | <b>4.80E-02</b> |
| Plasma FFA, mmol/l                        | 233 | 0.48   | 0.016 | 205 | 0.53   | 0.015 | <b>3.80E-02</b> |
| Plasma leptin, ng/mL                      | 189 | 9.65   | 0.569 | 185 | 7.84   | 0.422 | <b>1.20E-02</b> |
| P Selectin, ng/mL                         | 197 | 83.61  | 2.932 | 183 | 111.12 | 4.71  | <b>5.33E-09</b> |
| Total cholesterol, mg/dl                  | 188 | 168.74 | 2.632 | 186 | 181.82 | 2.425 | <b>2.95E-04</b> |
| Triglycerides, mg/dl                      | 182 | 69.93  | 2.83  | 182 | 84.55  | 2.95  | <b>1.00E-3</b>  |
| HDL, mg/dl                                | 187 | 65.19  | 2.151 | 184 | 60.92  | 1.860 | 0.134           |
| LDL, mg/dl                                | 188 | 100.03 | 2.033 | 184 | 107.88 | 2.171 | <b>9.00E-03</b> |
| Lp( a), mg/dl                             | 127 | 4.24   | 0.233 | 155 | 5.04   | 0.233 | <b>1.90E-02</b> |
| Plasma neuropeptide Y, pmol/L             | 258 | 71.32  | 1.896 | 252 | 82.02  | 2.009 | <b>1.20E-04</b> |
| <b>Biochemical: Renal</b>                 |     |        |       |     |        |       |                 |
| eGFR (CKD EPI), ml/min/1.73m <sup>2</sup> | 258 | 105.13 | 1.340 | 234 | 93.78  | 1.422 | <b>1.10E-08</b> |

Table S3: *SGCD* genotype-specific analysis: A comparison of pleiotropic effects across physical, physiological, and biochemical traits.

| Phenotype                                             | SGCD Merlin p   | FDR           | Model: Additive |     |          |        |
|-------------------------------------------------------|-----------------|---------------|-----------------|-----|----------|--------|
|                                                       |                 |               | Genotype        | N   | Mean     | SEM    |
| <b>Physical</b>                                       |                 |               |                 |     |          |        |
| Body mass index, kg/m <sup>2</sup>                    | <b>0.0158</b>   | <b>0.0237</b> | A/A             | 396 | 25.52    | 0.297  |
|                                                       |                 |               | G/A             | 174 | 24.64    | 0.378  |
|                                                       |                 |               | G/G             | 26  | 23.86    | 1.278  |
| <b>Physiological</b>                                  |                 |               |                 |     |          |        |
| Brachial artery compliance, ml/mmHg                   | <b>0.0179</b>   | <b>0.0179</b> | A/A             | 365 | 7.24E-02 | 0.001  |
|                                                       |                 |               | G/A             | 163 | 6.96E-02 | 0.001  |
|                                                       |                 |               | G/G             | 24  | 6.92E-02 | 0.003  |
| Cardiac output, ml/mmHg                               | 0.2433          | 0.1123        |                 |     |          |        |
| Heart rate, beats/min                                 | 0.2569          | 0.1101        | A/A             | 380 | 69.98    | 0.652  |
|                                                       |                 |               | G/A             | 167 | 68.09    | 0.953  |
|                                                       |                 |               | G/G             | 27  | 70.00    | 2.481  |
| Systolic blood pressure, mmHg                         | 0.7739          | 0.3096        | A/A             | 369 | 123.20   | 0.662  |
|                                                       |                 |               | G/A             | 166 | 122.90   | 1.016  |
|                                                       |                 |               | G/G             | 24  | 127.20   | 2.931  |
| Diastolic blood pressure, mmHg                        | 0.8427          | 0.3160        | A/A             | 370 | 76.00    | 0.496  |
|                                                       |                 |               | G/A             | 166 | 76.26    | 0.755  |
|                                                       |                 |               | G/G             | 25  | 76.54    | 1.520  |
| Stroke volume index, ml                               | 0.9716          | 0.3429        | A/A             | 365 | 39.41    | 0.279  |
|                                                       |                 |               | G/A             | 164 | 39.36    | 0.386  |
|                                                       |                 |               | G/G             | 22  | 39.61    | 0.669  |
| Systemic vascular compliance, ml/mmHg                 | <b>0.0131</b>   | <b>0.0261</b> | A/A             | 367 | 1.26     | 0.013  |
|                                                       |                 |               | G/A             | 164 | 1.21     | 0.019  |
|                                                       |                 |               | G/G             | 24  | 1.19     | 0.051  |
| Systemic vascular resistance, dynes/s/cm <sup>5</sup> | 0.1790          | 0.0895        | A/A             | 369 | 1499.00  | 18.630 |
|                                                       |                 |               | G/A             | 163 | 1560.00  | 24.252 |
|                                                       |                 |               | G/G             | 24  | 1463.00  | 98.668 |
| <b>Biochemical</b>                                    |                 |               |                 |     |          |        |
| CHGB [312-331], nmol/l                                | 0.05889         | <b>0.0321</b> | A/A             | 359 | 0.86     | 0.022  |
|                                                       |                 |               | G/A             | 151 | 0.94     | 0.038  |
|                                                       |                 |               | G/G             | 25  | 0.96     | 0.107  |
| CHGB [439-451], nmol/l                                | <b>0.0173</b>   | <b>0.0208</b> | A/A             | 362 | 0.33     | 0.008  |
|                                                       |                 |               | G/A             | 152 | 0.36     | 0.013  |
|                                                       |                 |               | G/G             | 24  | 0.34     | 0.027  |
| Plasma FFA, mmol/l                                    | <b>0.0322</b>   | <b>0.0215</b> | A/A             | 314 | 0.49     | 0.013  |
|                                                       |                 |               | G/A             | 129 | 0.51     | 0.021  |
|                                                       |                 |               | G/G             | 23  | 0.60     | 0.072  |
| Plasma norepinephrine, pg/ml                          | <b>9.89E-06</b> | <b>0.0001</b> | A/A             | 347 | 307.30   | 8.593  |
|                                                       |                 |               | G/A             | 155 | 359.80   | 13.815 |
|                                                       |                 |               | G/G             | 23  | 429.00   | 28.990 |
| Ratio urine to plasma uric acid                       | <b>0.0130</b>   | <b>0.0391</b> | A/A             | 334 | 5.63     | 0.209  |
|                                                       |                 |               | G/A             | 148 | 6.58     | 0.576  |
|                                                       |                 |               | G/G             | 23  | 7.94     | 1.026  |
| Uric acid plasma, mg/dl                               | <b>0.0348</b>   | <b>0.0209</b> | A/A             | 346 | 4.19     | 0.060  |
|                                                       |                 |               | G/A             | 152 | 4.07     | 0.089  |
|                                                       |                 |               | G/G             | 25  | 3.91     | 0.162  |
| Urine norepinephrine, ng/g                            | <b>0.0296</b>   | <b>0.0222</b> | A/A             | 290 | 275.33   | 7.884  |
|                                                       |                 |               | G/A             | 129 | 294.93   | 10.770 |
|                                                       |                 |               | G/G             | 25  | 312.01   | 27.061 |
